# Supplementary material
Source: ML conference proceedings conference paper supplement (https://www.ecva.net/papers/eccv_2022/papers_ECCV/html/136890515_ECCV_2022_paper.php)

Time

MaskTrack

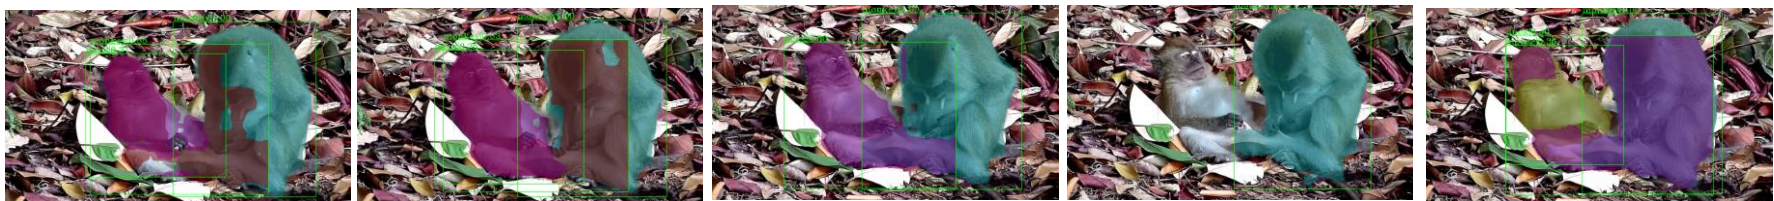

IAI (Ours)

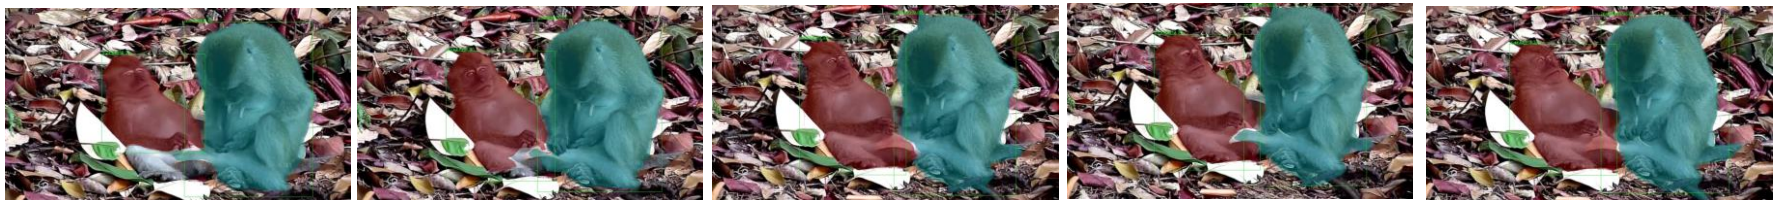

MaskTrack

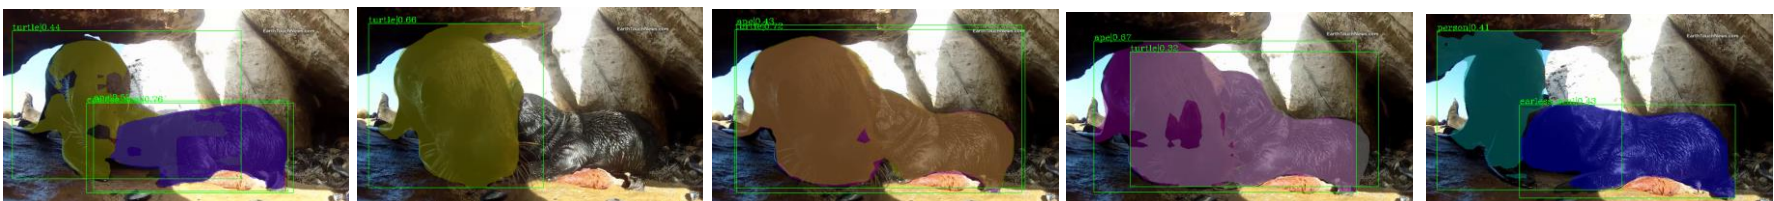

IAI (Ours)

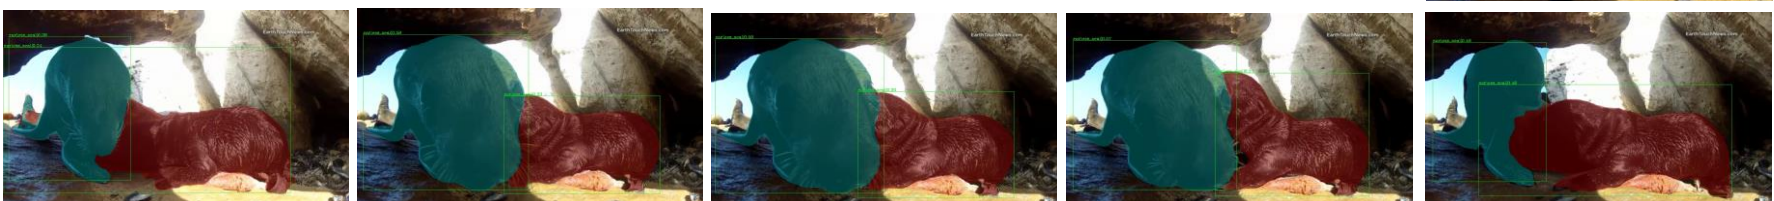

MaskTrack

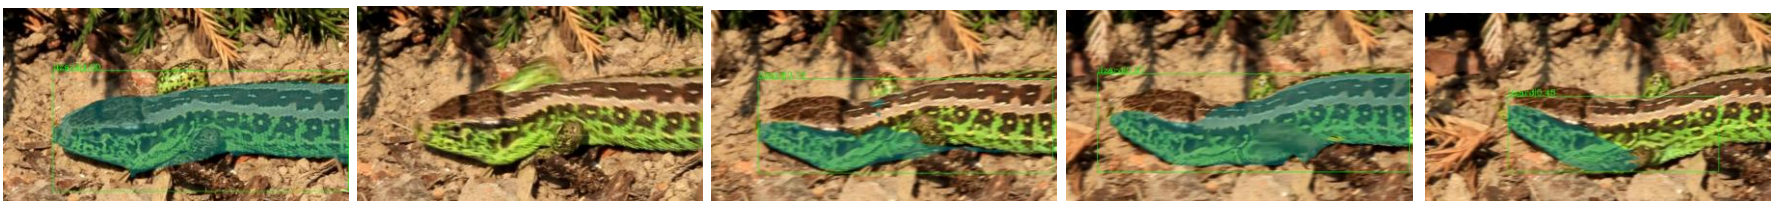

IAI (Ours)

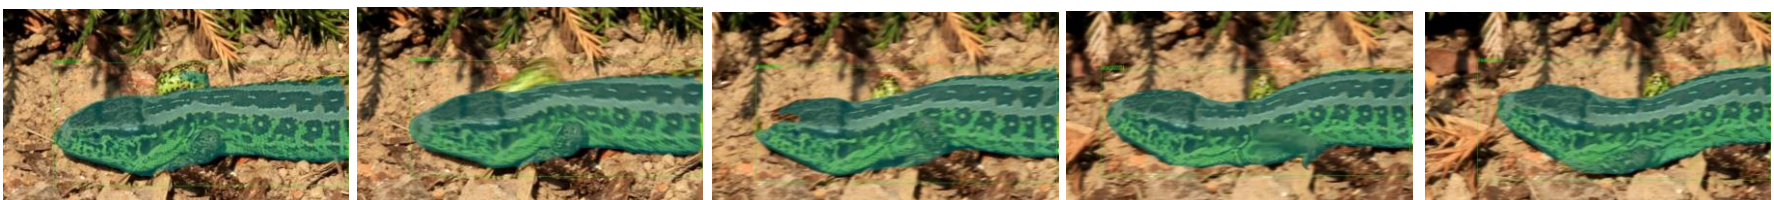

Supplement: Supplementary file 2 [file 136890515-supp.zip]
